# Supplementary material for: Relaxed Selection Among Duplicate Floral Regulatory Genes in Lamiales
Source: Springer Nature journal article supplement (doi:10.1007/s00239-005-0306-x), 2006-10-01
Supplement: supp.pdf [file supp.pdf]

**Table S1.** Homologues of *LFY/FLO* and *AP3/DEF* cloned previously or in this study. Gene names conform to the cited reference for previously cloned homologues, or follow the nomenclature for *Antirrhinum majus* if cloned in this study. For species with more than one homologue, an A or B designation describes the paralogy group within which genes cluster in phylogenetic analyses (Aagaard et al., 2005). Species with multiple A or B copies are given a further numeric designation. An abbreviation incorporating both species and gene names is used to label terminal branches in gene trees.

| <b>Species</b>                  | <b>Gene</b>   | <b>Abbreviation</b> | <b>Reference</b>              | <b>Accession</b> |
|---------------------------------|---------------|---------------------|-------------------------------|------------------|
| <i>Petunia hybrida</i>          | <i>ALF</i>    | PetHyALF            | Souer et al., 1998            | AF030171         |
|                                 | <i>PMADS1</i> | PetHyPMADS1         | Kush et al., 1993             | X69946           |
| <i>Solanum esculentum</i>       | <i>FA</i>     | LycEsFA             | Molinero-Rosales et al., 1999 | AF197935         |
|                                 | <i>AP3</i>    | LycEsAP3            | Kramer et al., 1998           | AF052868         |
| <i>Syringa vulgaris</i>         | <i>FLO</i>    | SyrVuFLO            | Aagaard et al., 2005          | AY524037         |
|                                 | <i>DEF</i>    | SyrVuDEF            | Aagaard et al., 2005          | AY524007         |
| <i>Antirrhinum majus</i>        | <i>FLO</i>    | AntMaFLO            | Coen et al., 1990             | M55525           |
|                                 | <i>DEF</i>    | AntMaDEF            | Sommer et al., 1990           | S12378           |
| <i>Chelone glabra</i>           | <i>FLO</i>    | CheGrFLO            | Aagaard et al., 2005          | AY524029         |
|                                 | <i>DEF</i>    | CheGrDEF            | Aagaard et al., 2005          | AY524008         |
| <i>Verbena officinalis</i>      | <i>FLOA</i>   | VerOfFLOA           | Aagaard et al., 2005          | AY524030         |
|                                 | <i>FLOB</i>   | VerOfFLOB           | Aagaard et al., 2005          | AY524038         |
|                                 | <i>DEFA</i>   | VerOfDEFA           | Aagaard et al., 2005          | AY524009         |
|                                 | <i>DEFB</i>   | VerOfDEFB           | Aagaard et al., 2005          | AY524014         |
| <i>Pedicularis groenlandica</i> | <i>FLOA</i>   | PedGrFLOA           | Aagaard et al., 2005          | AY524033         |
|                                 | <i>FLOB</i>   | PedGrFLOB           | Aagaard et al., 2005          | AY524039         |
|                                 | <i>DEFA</i>   | PedGrDEFA           | Aagaard et al., 2005          | AY524010         |
|                                 | <i>DEFB</i>   | PedGrDEFB           | Aagaard et al., 2005          | AY524017         |
| <i>Paulownia tomentosa</i>      | <i>FLOA</i>   | PauToFLOA           | Aagaard et al., 2005          | AY524034         |
|                                 | <i>FLOB</i>   | PauToFLOB           | Aagaard et al., 2005          | AY524040         |
|                                 | <i>DEFA</i>   | PauToDEFA           | Aagaard et al., 2005          | AY524011         |
|                                 | <i>DEFB</i>   | PauToDEFB           | Aagaard et al., 2005          | AY524018         |
| <i>Maxus reptans</i>            | <i>FLOA</i>   | MazReFLOA           | <i>this study</i>             | AY530546         |
|                                 | <i>DEFA</i>   | MazReDEFA           | <i>this study</i>             | AY530538         |
|                                 | <i>DEFB</i>   | MazReDEFB           | <i>this study</i>             | AY530542         |
| <i>Mimulus ringens</i>          | <i>FLOA</i>   | MimRiFLOA           | <i>this study</i>             | AY530547         |
|                                 | <i>DEFA</i>   | MimRiDEFA           | <i>this study</i>             | AY530539         |
|                                 | <i>DEFB</i>   | MimRiDEFB           | <i>this study</i>             | AY530543         |
| <i>Leucocarpus perfoliatus</i>  | <i>FLOA</i>   | LeuPerFLOA          | <i>this study</i>             | AY530548         |
|                                 | <i>FLOB</i>   | LeuPerFLOB          | <i>this study</i>             | AY530550         |
|                                 | <i>DEFA</i>   | LeuPerDEFA          | <i>this study</i>             | AY530540         |
|                                 | <i>DEFB</i>   | LeuPerDEFB          | <i>this study</i>             | AY530544         |
| <i>Mimulus kelloggii</i>        | <i>FLOA</i>   | MimKeFLOA           | <i>this study</i>             | AY530549         |
|                                 | <i>DEFA</i>   | MimKeDEFA           | <i>this study</i>             | AY530541         |
|                                 | <i>DEFB</i>   | MimKeDEFB           | <i>this study</i>             | AY530545         |
| <i>Mimulus lewisii</i>          | <i>FLOA</i>   | MimLeFLOA           | Aagaard et al., 2005          | AY524035         |
|                                 | <i>FLOB</i>   | MimLeFLOB           | Aagaard et al., 2005          | AY524041         |
|                                 | <i>DEFA</i>   | MimLeDEFA           | Aagaard et al., 2005          | AY524013         |
|                                 | <i>DEFB</i>   | MimLeDEFB           | Aagaard et al., 2005          | AY524019         |
| <i>Mimulus guttatus</i>         | <i>FLOA</i>   | MimGuFLOA           | Aagaard et al., 2005          | AY524036         |
|                                 | <i>FLOB</i>   | MimGuFLOB           | Aagaard et al., 2005          | AY524042         |
|                                 | <i>DEFA</i>   | MimGuDEFA           | Aagaard et al., 2005          | AY524012         |
|                                 | <i>DEFB</i>   | MimGuDEFB           | Aagaard et al., 2005          | AY524020         |

**Table S2.** Likelihood ratio test (LRT) statistics comparing branch-specific models (R1-R4) and fixed-sites models (C and E). The test statistic ( $2 \Delta \ln L$ ) is calculated as twice the difference between log-likelihood values for models, and compared with a chi-square distribution with degrees of freedom equal to the difference in the number of parameters between models (Table 1).

| <b>Gene</b>    | <b>Models Compared</b>               | <b><math>2 \Delta \ln L</math></b> |
|----------------|--------------------------------------|------------------------------------|
| <i>LFY/FLO</i> | One-ratio (R1) vs. Two-Ratio (R2)    | 7.104**                            |
|                | Two-ratio (R2) vs. Three-Ratio (R3)  | 1.236                              |
|                | Three-ratio (R3) vs. Four-Ratio (R4) | 58.992**                           |
|                | Model C vs. Model E                  | 59.590**                           |
| <i>AP3/DEF</i> | One-ratio (R1) vs. Two-Ratio (R2)    | 5.770*                             |
|                | Two-ratio (R2) vs. Three-Ratio (R3)  | 2.012                              |
|                | Three-ratio (R3) vs. Four-Ratio (R4) | 0.010                              |
|                | Model C vs. Model E                  | 0.212                              |

\*Significant at  $p \leq 0.05$ . \*\*Significant at  $p \leq 0.005$ .

**Table S3.** Likelihood ratio test (LRT) statistics comparing sites models (M1a-M8) and branch-sites-models (A and B). The test statistic ( $2 \Delta \ln L$ ) is calculated as twice the difference between log-likelihood values for models, and compared with a chi-square distribution with degrees of freedom equal to the difference in the number of parameters between models (Table 2).

| <b>Gene</b>    | <b>Models Compared</b>             | <b><math>2 \Delta \ln L</math></b> |
|----------------|------------------------------------|------------------------------------|
| <i>LFY/FLO</i> | Neutral (M1a) vs. Selection (M2a)  | 0.000                              |
|                | Beta (M7) vs. Beta & $\omega$ (M8) | 8.984*                             |
|                | ModelA vs. ModelA <sub>null</sub>  | 0.000                              |
| <i>AP3/DEF</i> | Neutral (M1a) vs. Selection (M2a)  | 0.000                              |
|                | Beta (M7) vs. Beta & $\omega$ (M8) | 3.682                              |
|                | ModelA vs. ModelA <sub>null</sub>  | 0.000                              |

\*Significant at  $p \leq 0.05$ . \*\*Significant at  $p \leq 0.005$ .
